# Supplementary material for: Hydrophilic magnetic covalent triazine frameworks for differential N-glycopeptides enrichment in breast cancer plasma membranes
Source: Royal Society of Chemistry journal article supplement (doi:10.1039/d1tb02290c), 2021-12-16
Supplement: d1tb02290c1.pdf [file d1tb02290c1.pdf]

## Supporting Information

### **Hydrophilic magnetic covalent triazine frameworks fishing for differential N-glycopeptides in breast cancer plasma membrane**

Zhiyu Li, Yichun Gao, Huinan Zhang, Fang Lan, \* and Yao Wu

#### **Characterization.**

A vibrating sample magnetometer (VSM, Model PPMS, Quantum Design Company, USA) was employed to measure the magnetization of the samples with field strength varying from 0 to 20000 Oe at 300 K. X-ray photoemission spectroscopy (XPS) was conducted using a Kratos XSAM 800 instrument equipped with a monochromatic Al anode X-ray gun (12 kV, 15 mA,  $10^{-5}$  Pa). The mass loss of the samples was analyzed at temperatures ranging from 35 to 900 °C at the heating rate of 10 K min<sup>-1</sup> by simultaneous thermal analysis (STA449 C Jupiter, NETZSCH). Fourier transform infrared spectra were obtained by a spectrometer (FTIR, PE spectrometer) with wavenumber in the range of 500-4000 cm<sup>-1</sup>. The morphologies of the samples were observed by scanning electron microscopy (SEM, Hitachi S-4800, Japan) and transmission electron microscopy (TEM, JEOL, JEM-100CX, Japan). Surface area and pore size analyzer (Micromeritics, USA) was employed to study the surface and BJH pore size distribution at 77K. Elite-LC-MS/MS analysis by Easy-nLC nanoflow HPLC system connected to Orbitrap Elite mass spectrometer (Thermo Fisher Scientific, San Jose, CA, USA). MALDI-TOF/TOF analyzed by mass spectrometer (Bruker Daltonics, USA).

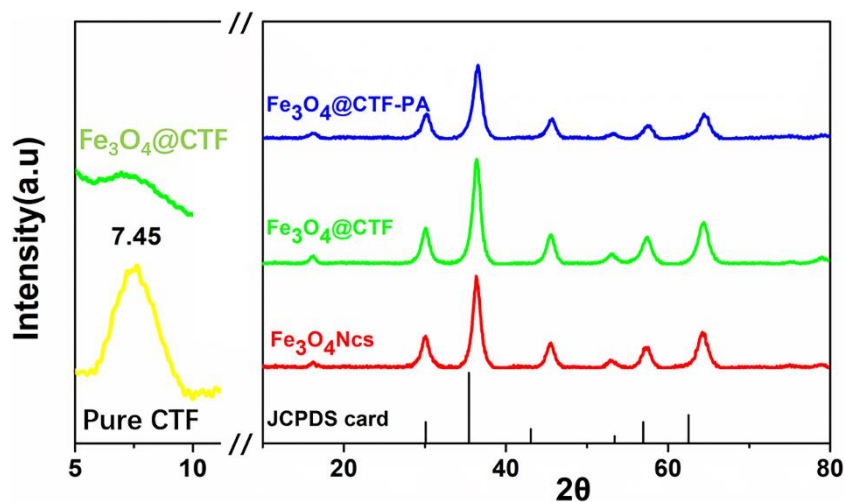

Fig. S1. The wide-angle and small-angle XRD profiles of materials.

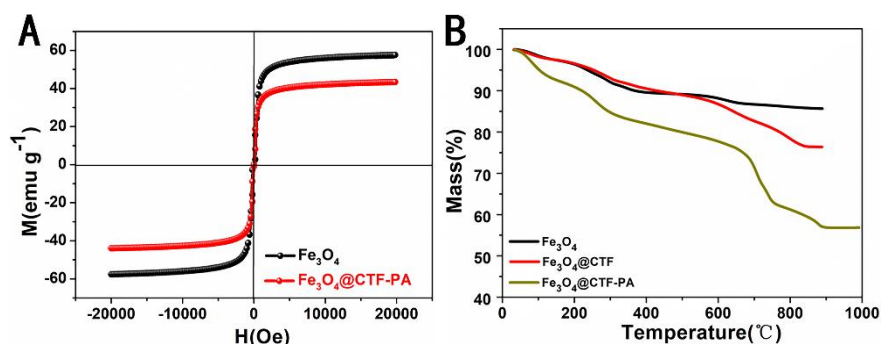

Fig. S2. (A) VSM curves of the  $\text{Fe}_3\text{O}_4$  nanoparticles and  $\text{Fe}_3\text{O}_4@CTF-PA$  nanoparticles; (B) TGA curves of the  $\text{Fe}_3\text{O}_4$  nanoparticles,  $\text{Fe}_3\text{O}_4@CTF$  nanoparticles and  $\text{Fe}_3\text{O}_4@CTF-PA$  nanoparticles.

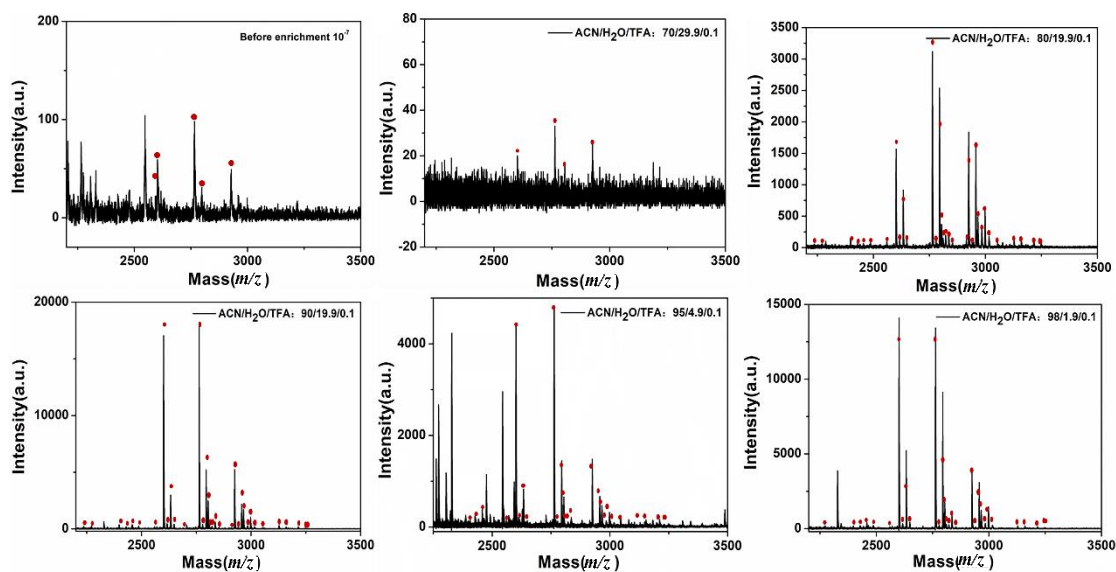

Fig. S3. The enrichment conditions screening of  $\text{Fe}_3\text{O}_4@CTF-PA$  nanoparticles selective adsorption N-glycopeptides, elution conditions ACN/ $\text{H}_2\text{O}$ /TFA:9.9/90/0.1, IgG digestion solution concentration of 100 fmol, N-glycopeptides were marked by red dots.

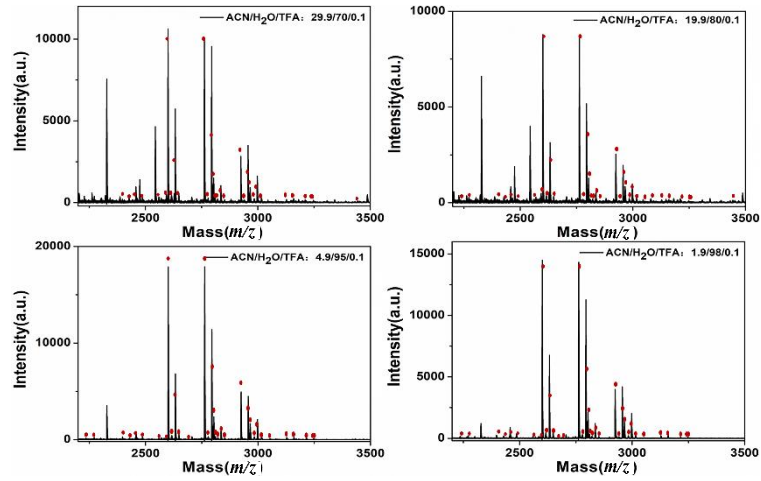

Fig. S4. The  $\text{Fe}_3\text{O}_4$ @CTF-PA nanoparticle selective adsorption N-glycopeptides elution conditions screening, N-glycopeptides were marked by red dots.

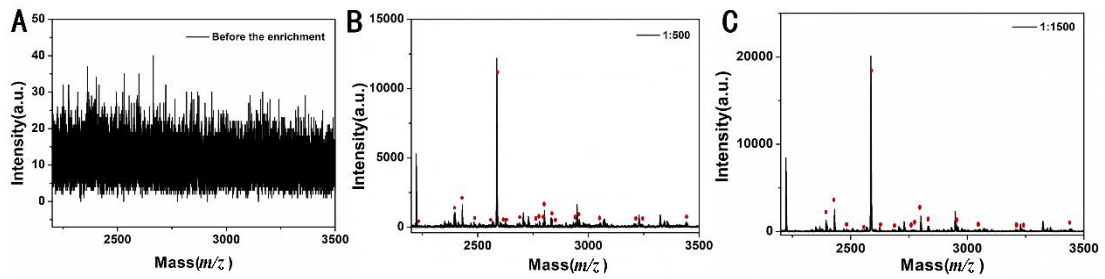

Fig. S5. MALDI-TOF mass spectrometry: Enrichment of IgG and BSA digestions (molar ratio 1:500, 1:1500) with different proportions by  $\text{Fe}_3\text{O}_4$ @CTF-PA nanoparticle, N-glycopeptides were marked by red dots

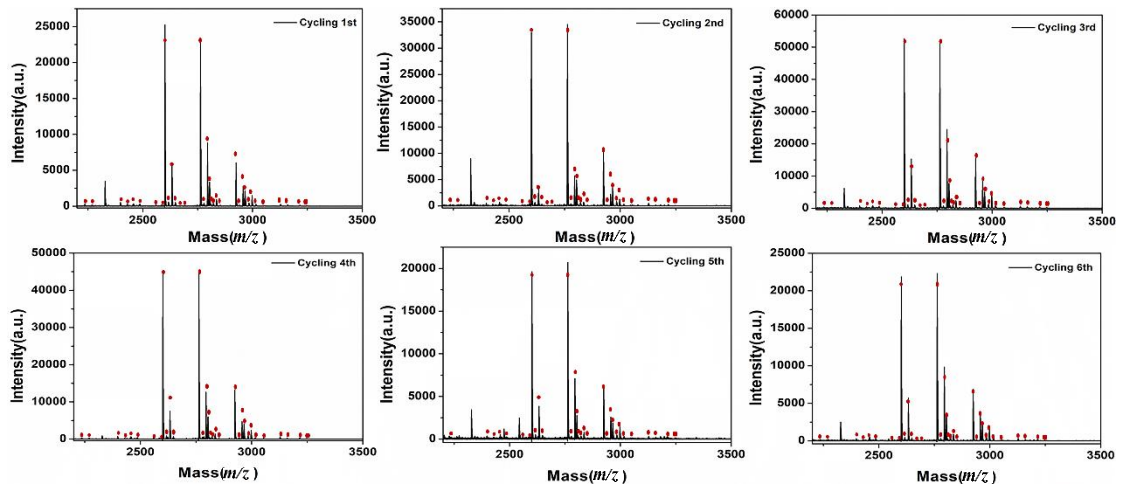

Fig. S6. MALDI-TOF mass spectra of N-glycopeptides with concentration of 100 fmol after enrichment by  $\text{Fe}_3\text{O}_4$ @CTF-PA nanoparticles, N-glycopeptides were marked by red dots.

### KEGG pathway annotation

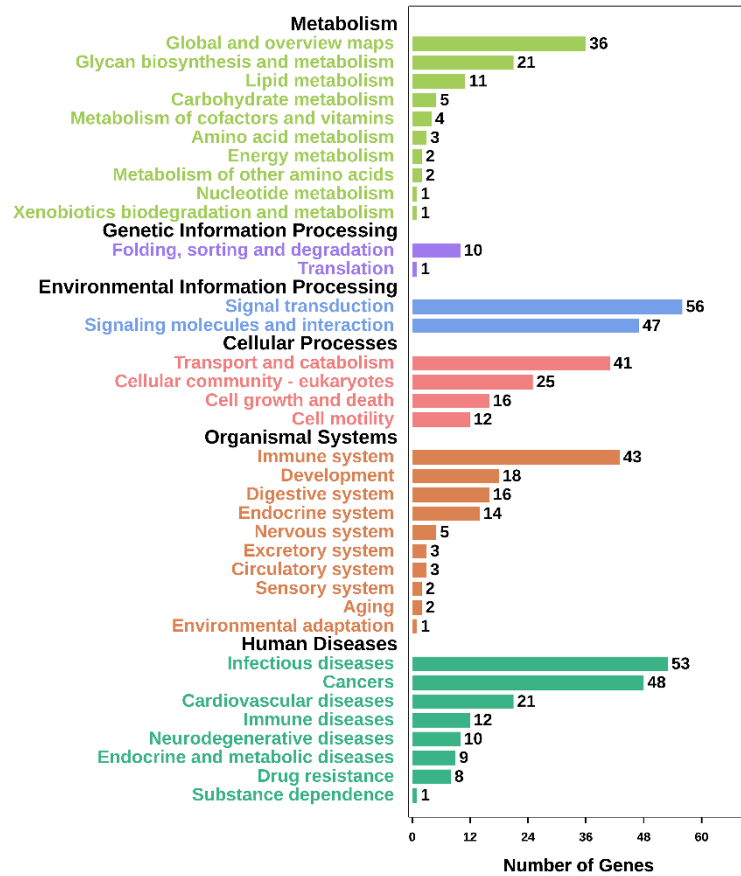

Fig. S7. KEGG pathway analysis mapping.

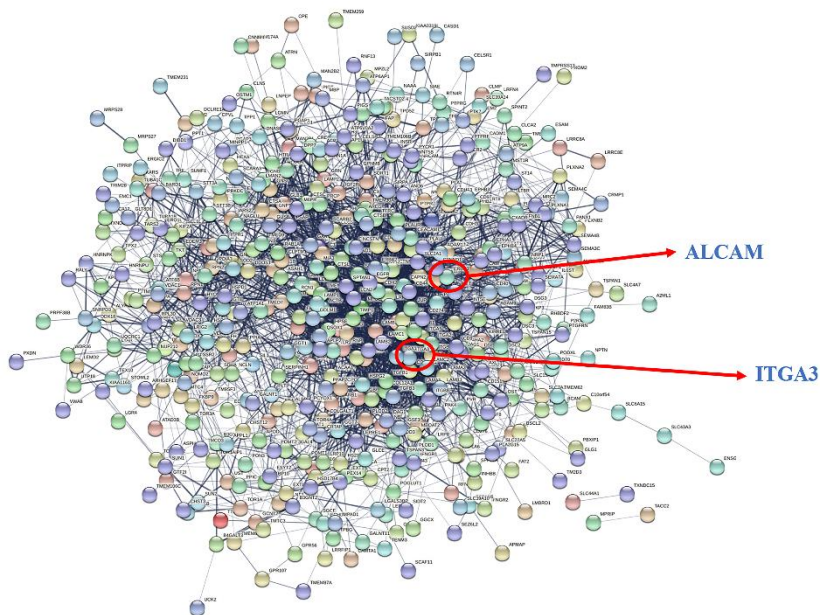

Fig. S8. PPI analysis mapping.

Table. S1. Observed molecular masses, proposed glycan compositions and peptide sequences of N-glycopeptides enriched from IgG tryptic digests by the Fe<sub>3</sub>O<sub>4</sub>@CTF-PA nanoparticle. Hex, HexNAc, Fuc and NeuAc are the abbreviations of hexose, N-acetylhexosamine, fucose and N-acetylneuraminic acid, respectively. N& denotes the glycosylation sites.

| Number | m/z    | Glycan composition            | Peptide sequence |
|--------|--------|-------------------------------|------------------|
| 1      | 2236.4 | [Hex]3[HexNAc]2[Fuc]1         | EEQFN&STFR       |
| 2      | 2398.2 | [Hex]3[HexNAc]3[Fuc]1         | EEQFN&STFR       |
| 3      | 2430.3 | [Hex]3[HexNAc]3[Fuc]1         | EEQYN&STYR       |
| 4      | 2455.3 | [Hex]3[HexNAc]4               | EEQFN&STFR       |
| 5      | 2487.3 | [Hex]3[HexNAc]4               | EEQYN&STYR       |
| 6      | 2561.3 | [Hex]4[HexNAc]3[Fuc]1         | EEQFN&STFR       |
| 7      | 2592.3 | [Hex]4[HexNAc]3[Fuc]1         | EEQYN&STYR       |
| 8      | 2602.2 | [Hex]3[HexNAc]4[Fuc]1         | EEQFN&STFR       |
| 9      | 2617.2 | [Hex]3[HexNAc]4[Fuc]1         | EEQFN&STFR       |
| 10     | 2633.1 | [Hex]3[HexNAc]4[Fuc]1         | EEQYN&STYR       |
| 11     | 2649.2 | [Hex]4[HexNAc]4               | EEQYN&STYR       |
| 12     | 2691.3 | [Hex]3[HexNAc]5               | EEQYN&STYR       |
| 13     | 2764.1 | [Hex]4[HexNAc]4[Fuc]1         | EEQFN&STFR       |
| 14     | 2779.1 | [Hex]5[HexNAc]4               | EEQFN&STFR       |
| 15     | 2796.0 | [Hex]4[HexNAc]4[Fuc]1         | EEQYN&STYR       |
| 16     | 2804.3 | [Hex]3[HexNAc]5[Fuc]1         | EEQFN&STFR       |
| 17     | 2812.3 | [Hex]5[HexNAc]4               | EEQYN&STYR       |
| 18     | 2821.2 | [Hex]4[HexNAc]5               | EEQFN&STFR       |
| 19     | 2837.0 | [Hex]3[HexNAc]5[Fuc]1         | EEQYN&STYR       |
| 20     | 2853.2 | [Hex]4[HexNAc]5               | EEQYN&STYR       |
| 21     | 2908.0 | [Hex]4[HexNAc]4[NeuAc]1       | EEQFN&STFR       |
| 22     | 2925.9 | [Hex]5[HexNAc]4[Fuc]1         | EEQFN&STFR       |
| 23     | 2942.2 | [Hex]5[HexNAc]4[Fuc]1         | EEQFN&STYR       |
| 24     | 2958.0 | [Hex]5[HexNAc]4[Fuc]1         | EEQYN&STYR       |
| 25     | 2966.2 | [Hex]4[HexNAc]5[Fuc]1         | EEQFN&STFR       |
| 26     | 2983.3 | [Hex]5[HexNAc]5               | EEQFN&STFR       |
| 27     | 2999.0 | [Hex]4[HexNAc]5 [Fuc]1        | EEQYN&STYR       |
| 28     | 3016.0 | [Hex]5[HexNAc]5               | EEQYN&STYR       |
| 29     | 3054.3 | [Hex]4[HexNAc]4[Fuc]1[NeuAc]1 | EEQFN&STFR       |

|    |        |                               |                |
|----|--------|-------------------------------|----------------|
| 30 | 3128.3 | [Hex]5[HexNAc]5[Fuc]1         | EEQFN&STFR     |
| 31 | 3161.1 | [Hex]5[HexNAc]5[Fuc]1         | EEQYN&STYR     |
| 32 | 3217.1 | [Hex]5[HexNAc]4[Fuc]1[NeuAc]1 | EEQFN&STFR     |
| 33 | 3247.0 | [Hex]4[HexNAc]4[Fuc]1         | TKPREEQFN&STFR |
| 34 | 3250.0 | [Hex]5[HexNAc]4[Fuc]1[NeuAc]1 | EEQYN&STYR     |
| 35 | 3441.3 | [Hex]5[HexNAc]4[Fuc]1         | TKPYEEQYN&STYR |

Table. S2. The number of unique glycoproteins of the two cell membranes involved in the top 20 CC entries of significance.

| Number of GO | CC                                                      | SK-BR-3 | MCF-10A |
|--------------|---------------------------------------------------------|---------|---------|
| GO:0031224   | intrinsic component of membrane                         | 73      | 168     |
| GO:0016021   | integral component of membrane                          | 73      | 167     |
| GO:0101003   | ficolin-1-rich granule membrane                         | 5       | 35      |
| GO:0044425   | membrane part                                           | 75      | 168     |
| GO:0030667   | secretory granule membrane                              | 16      | 72      |
| GO:0031233   | intrinsic component of external side of plasma membrane | 9       | 30      |
| GO:1903561   | extracellular vesicle                                   | 60      | 124     |
| GO:0043230   | extracellular organelle                                 | 60      | 124     |
| GO:0070062   | extracellular exosome                                   | 60      | 122     |
| GO:0065010   | extracellular membrane-bounded organelle                | 60      | 122     |
| GO:0012505   | endomembrane system                                     | 70      | 148     |
| GO:0005604   | basement membrane                                       | 15      | 50      |
| GO:0098588   | bounding membrane of organelle                          | 63      | 134     |
| GO:0043083   | synaptic cleft                                          | 11      | 18      |
| GO:0030659   | cytoplasmic vesicle membrane                            | 35      | 92      |
| GO:0031226   | intrinsic component of plasma membrane                  | 44      | 123     |
| GO:0009986   | cell surface                                            | 47      | 118     |
| GO:0005887   | integral component of plasma membrane                   | 43      | 121     |
| GO:0009897   | external side of plasma membrane                        | 27      | 91      |
| GO:0005788   | endoplasmic reticulum lumen                             | 34      | 58      |

Table. S3. The number of unique glycoproteins of the two cell membranes involved in the top 20 BP entries of significance.

| <b>Number of GO</b> | <b>BP</b>                                                                      | <b>SK-BR-3</b> | <b>MCF-10A</b> |
|---------------------|--------------------------------------------------------------------------------|----------------|----------------|
| GO:0007157          | heterophilic cell-cell adhesion via plasma membrane cell adhesion molecules    | 17             | 43             |
| GO:0035924          | cellular response to vascular endothelial growth factor stimulus               | 11             | 36             |
| GO:0038084          | vascular endothelial growth factor signaling pathway                           | 5              | 39             |
| GO:0031290          | retinal ganglion cell axon guidance                                            | 14             | 3              |
| GO:0008038          | neuron recognition                                                             | 16             | 53             |
| GO:0097374          | sensory neuron axon guidance                                                   | 6              | 19             |
| GO:0007413          | axonal fasciculation                                                           | 4              | 42             |
| GO:1900746          | regulation of vascular endothelial growth factor signaling pathway             | 10             | 24             |
| GO:1902547          | regulation of cellular response to vascular endothelial growth factor stimulus | 8              | 23             |
| GO:0048333          | mesodermal cell differentiation                                                | 10             | 36             |
| GO:0042661          | regulation of mesodermal cell fate specification                               | 11             | 2              |
| GO:0042476          | odontogenesis                                                                  | 15             | 54             |
| GO:0048846          | axon extension involved in axon guidance                                       | 14             | 33             |
| GO:1902284          | neuron projection extension involved in neuron projection guidance             | 12             | 34             |
| GO:0010669          | epithelial structure maintenance                                               | 9              | 31             |
| GO:0016525          | negative regulation of angiogenesis                                            | 21             | 36             |
| GO:2000181          | negative regulation of blood vessel morphogenesis                              | 17             | 39             |
| GO:0007424          | open tracheal system development                                               | 23             | 51             |
| GO:0099560          | synaptic membrane adhesion                                                     | 10             | 24             |
| GO:0090598          | male anatomical structure morphogenesis                                        | 12             | 25             |

Table. S4. The number of unique glycoproteins of the two cell membranes involved in the top 20 MF entries of significance.

| <b>Number of GO</b> | <b>MF</b>               | <b>SK-BR-3</b> | <b>MCF-10A</b> |
|---------------------|-------------------------|----------------|----------------|
| GO:0001618          | virus receptor activity | 13             | 51             |
| GO:0043236          | laminin binding         | 12             | 36             |
| GO:0005518          | collagen binding        | 16             | 44             |

|            |                                                                                        |    |    |
|------------|----------------------------------------------------------------------------------------|----|----|
| GO:0050840 | extracellular matrix binding                                                           | 16 | 40 |
| GO:0019838 | growth factor binding                                                                  | 20 | 59 |
| GO:0005178 | integrin binding                                                                       | 18 | 64 |
| GO:0070051 | fibrinogen binding                                                                     | 2  | 22 |
| GO:0043184 | vascular endothelial growth factor receptor 2 binding                                  | 1  | 16 |
| GO:0071936 | coreceptor activity involved in Wnt signaling pathway                                  | 5  | 15 |
| GO:0005172 | vascular endothelial growth factor receptor binding                                    | 1  | 16 |
| GO:0070700 | BMP receptor binding                                                                   | 8  | 17 |
| GO:1904929 | coreceptor activity involved in Wnt signaling pathway, planar<br>cell polarity pathway | 4  | 14 |
| GO:0098631 | protein binding involved in cell adhesion                                              | 10 | 38 |
| GO:0038085 | vascular endothelial growth factor binding                                             | 3  | 15 |
| GO:0001846 | opsonin binding                                                                        | 6  | 18 |
| GO:0086080 | protein binding involved in heterotypic cell-cell adhesion                             | 2  | 18 |
| GO:0038064 | collagen receptor activity                                                             | 2  | 15 |
| GO:1990405 | protein antigen binding                                                                | 5  | 20 |
| GO:0015026 | coreceptor activity                                                                    | 9  | 29 |
| GO:0001540 | beta-amyloid binding                                                                   | 17 | 37 |

---
